# Supplementary material for: Genome-Wide Characterization and Expression Analysis of Soybean TGA Transcription Factors Identified a Novel TGA Gene Involved in Drought and Salt Tolerance
Source: Front Plant Sci. 2019 May 16;10:549. doi: 10.3389/fpls.2019.00549 (PMC6531876; doi:10.3389/fpls.2019.00549)
Supplement: Table S1 — Primers and sequences used in this study. [file Table_1.xls]

## Sheet: Sheet1
Table S1 The primers and sequences used in this study
primer name	sequence（5¢-3¢）	Experiment
TGA1-RTF	GGAGATCAAAAGACCCTTCGTA	GmTGA1 expression analysis
TGA1-RTR	AACCCAGTGAGCATAGTCTATG
TGA2-RTF	CCTCCTTGTCCAAAACGATTAC	GmTGA2 expression analysis
TGA2-RTR	CTGTAGTAGGATGCACTAGAGC
TGA3-RTF	CTCAGAGGCTGCAATATTTGAC	GmTGA3 expression analysis
TGA3-RTR	CCAAAAACAAGGTGGAATACGT
TGA4-RTF	TTTCCTGCTTAATGGTTTGTGG	GmTGA4 expression analysis
TGA4-RTR	CACCACGAAACAAGTTCAGTTT
TGA5-RTF	TATGTGCAACAACTAGAGAGCA	GmTGA5 expression analysis
TGA5-RTR	GTCAACAATGGTTCGAAGTTCA
TGA6-RTF	CAATTGTTTGGCGCATTATGAC	GmTGA6 expression analysis
TGA6-RTR	TATGCCCAATATTTGTTGCTCG
TGA7-RTF	ACTTCAGATGGCTCGTACTATG	GmTGA7 expression analysis
TGA7-RTR	GTTTGTTGCCTAAGGTGATCTG
TGA8-RTF	AGTACGACCAAGACACTAACAG	GmTGA8 expression analysis
TGA8-RTR	GATTCTAACTGCTGCACGTATG
TGA9-RTF	ACAATTAGAATCAAGCCGTTCG	GmTGA9 expression analysis
TGA9-RTR	TTGATCCTATATAGCCGGCATC
TGA10-RTF	CAGCTAGAGCAAGAGGTAGATC	GmTGA10 expression analysis
TGA10-RTR	CCATACTCCATCTTGAAAAGCG
TGA11-RTF	ATAACATCGGACTCTTTGTGGT	GmTGA11 expression analysis
TGA11-RTR	CTCTGAGACGATGGAAGTACTC
TGA12-RTF	GCTTCGAACTGCATTTCCATAT	GmTGA12 expression analysis
TGA12-RTR	GAATGCTGAAGATCCGAGAAAC
TGA13-RTF	GCTCGAAAGTAGTCGCTTAAAG	GmTGA13 expression analysis
TGA13-RTR	AAGTTCTGTATCACCTGCATGA
TGA14-RTF	TATGGTCATATGTGAACTCGGG	GmTGA14 expression analysis
TGA14-RTR	GCTCTAAGACGGCCATAATACT
TGA15-RTF	TCATTTTATGCATACGGGCTTG	GmTGA15 expression analysis
TGA15-RTR	CACAGACTCATGGCAGATTCTA
TGA16-RTF	GATCTTTCGCTACTGTGTGAAC	GmTGA16 expression analysis
TGA16-RTR	ATTCTCACCTTCTCTGAAGCTG
TGA17-RTF	CCAAGAGCAGCCTCTTCACA	GmTGA17 expression analysis
TGA17-RTR	ATCCACGAACAAGCCCTGAG
TGA18-RTF	GTGAAGCACTAGAACGTTTTGT	GmTGA18 expression analysis
TGA18-RTR	CATGAACGAGCAGTCCATAAAG
TGA19-RTF	CATCATAGCGCATCATCATCAG	GmTGA19 expression analysis
TGA19-RTR	AATGCTCCAAAGTCAGAAACAC
TGA20-RTF	CACAAGTCCAAACTCCAAAGAG	GmTGA20 expression analysis
TGA20-RTR	AGTCTGTTTGGCTTGCTTTATG
TGA21-RTF	GAGAGTTGCTTGAGTCACTACT	GmTGA21 expression analysis
TGA21-RTR	GATCAGTCAAAGGCTCAAGTTG
TGA22-RTF	GTTGTTTCAGTCGCCATAGTTT	GmTGA22 expression analysis
TGA22-RTR	GACTAGCATTTTGAACCCACTG
TGA23-RTF	CTCACAACAAGGTTACAAGAGC	GmTGA23 expression analysis
TGA23-RTR	CACAGACTCATGGCAGATTCTA
TGA24-RTF	GAACTTCGAACCATTGTTGACA	GmTGA24 expression analysis
TGA24-RTR	CTCCAACTGACTTTCAAGAAGC
TGA25-RTF	TCTAAGCCTATGCATGTAGAGC	GmTGA25 expression analysis
TGA25-RTR	CCTTCATGTTCAGAACTTGACG
TGA26-RTF	TTCACCACTCTATTGCCATTCT	GmTGA26 expression analysis
TGA26-RTR	GAATGCTGAAGATCCGAGAAAC
TGA27-RTF	GCAACAAATTCACCGCATATTG	GmTGA27 expression analysis
TGA27-RTR	TTGCAAGAGTGAAAAACCTACG
TGA17-CF	GCCATAAAGCAAGCCAAACAGA	Cloning GmTGA17
TGA17-CR	TGTAAAGCAGCCCAACGAAA
TGA17-GFPF	TATCTCTAGAGGATCCATGGCGAGCCACAGAATAGG	Subcellular localization analysis of GmTGA17
TGA17-GFPR	TGCTCACCATGGATCCGAAACTTGAG AAATAATTCT G
NtTGA2.2-RFPF	GACTCTAGAGGATCCATGGCTGATA TCAGTCCTAG	Positive control of subcellular localization
NtTGA2.2-RFPR	GGTGGCGGCGGATCCTTATTCCCGG GGGCGA
TGA17-BDF	CATGGAGGCCGAATTCATGGCGAGCCACAGAATAGG	Transcriptional activation activity analysis of GmTGA17 in yeast cells
TGA17-BDR	GGATCCCCGGGAATTCTCAGAAACTT GAGAAATAAT
TGA17-LUC F	ATGAAGCTACTGTCTTCTAT	Transient dual-luciferase expression assay
TGA17-LUC R	GAAACTT GAGAAATAATTCT
At2A-BDF	CATGGAGGCCGAATTCATGGCAGTTTATGATCAGA	Positive control of transcriptional activation activity analysis in yeast cells
At2A- BDR	GGATCCCCGGGAATTCGTTCTCCAGATCCAAGTAAC
At2A-LUC F	ATGAAGCTACTGTCTTCTAT	Positive effector of the transient dual-luciferase expression assay
At2A-LUC R	GTTCTCCAGATCCAAGTAAC
TGA17-1302F	GGGACTCTTGACCATGATGGCGAGCCACAGAATAGG	Construct GmTGA17 heterologous overexpression vector
TGA17-1302R	TCAGATCTACCCATGGTCAGAAACTTGAG AAATAATT
TGA17-DTF	GACGCACAATCCCACTATCC	PCR detection of genomic DNA in transgenic plants
TGA17-DTR	GAGCCAAACGTCTCAATGTCT
TGA17-3301F	GACTCTTGACCATGATGGCGAGCCACAGAATAGG	Construct GmTGA17 overexpression vector
TGA17-3301R	TTCGAGCTGG TCACCTCAGAAACTT GAGAAATAAT
TGA17Pro-3301F	CATGATTACGAATTCACCAATCACCTTTCTGGACAG	Promoter activity analysis of GmTGA17
TGA17Pro-3301R	CTCAGATCTACCATGG GCAAAGCTTT TATTTTTAGA CC
GUS-F	GCTATACGCCTTTGAAGCC	GUS expression analysis
GUS-R	TTGACTGCCTCTTCGCTGTA
RD29A-F	TTCTGTAAGGACGACGTTTACA	AtRD29A expression analysis
RD29A-R	CGTACTCGTTACATCCTCTGTT
RD29B-F	GAAACCAAAGATGAGTCGACAC	AtRD29B expression analysis
RD29B-R	TTTTTCGTAAACCGGAGTCAAC
RD22-F	GACTTTCGATTTTACCGACGAG	AtRD22 expression analysis
RD22-R	CGCTACCGGTTTTACCTTTATG
KIN1-F	CTGGAGCTGGAGCACAACAG	AtKIN1 expression analysis
KIN1-R	TTGTTCAGGCCGGTCTTGTC
COR15A-F	CATTAGCAGATGGTGAGAAAGC	AtCOR15A expression analysis
COR15A-R	TCTCAGCTTCTTTACCCAATGT
NCED3-F	GATGAATTTGTTCCAGAGAGCG	AtNCED3 expression analysis
NCED3-R	AACACTAGGATCAGCCGTTTTA
COR47-F	GAAGATCAAGGAGAAGCTTCCT	AtCOR47 expression analysis
COR47-R	TTCTTCACTTCCTCTTCAGTGG
RAB18-F	GTTCGTATTACAGAGGAGCTCA	AtRAB18 expression analysis
RAB18-R	GTCTGATAGGTTTGTGAACGTG
AtActin2 F (At3g18780)	GAAATCACAGCACTTGCACC	Reference for expression analysis
AtActin2 R (At3g18780)	AAGCCTTTGATCTTGAGAGC
GmCYP2F (Glyma.12g024700)	ACCAGAATTGCATTACCAGTTGA	Reference for expression analysis
GmCYP2R (Glyma.12g024700)	GGTGCCGAGACTCATGAAGATAT
Ligated fragment	catgCCATGGTGCAAAGACATTGAGACGTTTGGCTCAAAACAGAGAGGCTGCAAGGAAAAGCCGTCTGAGGAAAAAGGCTTATGTGCAGCAACTAGAGTCAAGTAGATTAAAGCTTAACCAGATAGAACAAGAACTTCAAAGAGCACGCCCTCAGGGCTTGTTCGTGGATTGTGGTGGTGTTGGAAGTACTGTAAGCTCGGCAGGAGCCGGTAATTATTCTTCAATAATAGTATCATCTCCTAATCCTATTAACTTTTCAGGCTCTTAAGAAGGAACTAATATGCTTGGTTTGTGTTGATTTTAATTTAAACTGTTTTTTGTTTTGTTTCTTAGCGGCTCCTGCCGAGCTTACAGTACTTCCAACACCACCACAATCCACGAACAAGCCCTGAGGGCGT…	Construct RNAi suppression vector
	Note:The underlined nucleotide sequence indicate the NcoI and BstEII restriction enezyme cutting site, respectively. Lowercase nucleic acid bases indicate protective base. Blue, red, and green nucleotide sequence indicate the sequence from CDS positions 549 to 750, the first intron sequence, and the reverse complement sequence of the sequence from CDS positions 549 to 750, respectively.
